# Supplementary material for: Influence of Cognitive Function on Postural Control in Physically Independent Older Women: A Time and Time-Frequency Domain Analysis
Source: Research Square preprint supplement (doi:10.21203/rs.3.rs-6946491/v1), 2025-07-31
Supplement: Supplementary file 1 [file b7b2501a446e3796baf67e72.pdf]

## STRUCTURED DIAGNOSTIC INTERVIEW FORM

### 1. Participant Identification

- a) Full Name: \_\_\_\_\_
- b) Sex: (1) Female (2) Male
- c) Race/Ethnicity: (1) White (2) Black (3) Pardo (Mixed race) (4) Asian  
(Japanese /Chinese descente) (5) Indigenous
- d) Date of Birth: \_\_\_\_\_ e) Age: \_\_\_\_\_ years
- f) Place of birth – City: \_\_\_\_\_ g) State/Province: \_\_\_\_\_
- h) Country: \_\_\_\_\_
- i) Home address: \_\_\_\_\_
- j) Phone number(s): \_\_\_\_\_
- k) Emergency contact - Name and relationship: \_\_\_\_\_
- l) Phone: \_\_\_\_\_

### 2. Socio-demographic Profile

- a) How long have you lived in the city of Londrina? \_\_\_\_\_
- b) What is the highest number of years you attended school? \_\_\_\_\_
- c) Education level:
- (1) Illiterate
  - (2) Incomplete elementary education (1–7 years)
  - (3) Complete elementary education (8 years)
  - (4) Incomplete high school education (9–10 years)
  - (5) Complete high school education (11 years)
  - (6) Higher education (undergraduate degree)
  - (7) Postgraduate education (specialization, master's, PhD)

**d) What is your religion?**

(1) Catholic (2) Protestant (3) Spiritist (4) None (5) Atheist (6) Other:

\_\_\_\_\_

**e) What is your marital status?**

(1) Single (2) Married or living with a partner (3) Separated or divorced (4) Widowed (5) Other: \_\_\_\_\_

**f) Do you have children?**

(0) Yes (1) No If yes, how many? \_\_\_\_\_

**g) How many people live in your household (including yourself)? \_\_\_\_\_**

**h) With whom do you live?**

(1) Alone (2) Spouse or partner (3) Children (4) Grandchildren (5) Others:

\_\_\_\_\_

**i) What was your main occupation during your working life? \_\_\_\_\_**

**j) What was your occupation in the past 12 months? \_\_\_\_\_**

**k) What is your current work or income status?**

(1) Retired

(2) Receiving a pension

(3) Retired and receiving a pension

(4) Retired and still working (5) Receiving a pension and still working

(6) Retired, receiving a pension, and still working

(7) Currently employed (not retired)

(8) Unpaid work (e.g., volunteer, caregiver, homemaker)

(9) Other: \_\_\_\_\_

**l) Do you have enough money to cover your basic needs?**

(1) Not at all (2) A little (3) Moderately (4) Mostly (5) Completely

### 3. Health Conditions and Perception

**a) Blood Pressure:** a) Diastolic: \_\_\_\_\_ mmHg    b) Systolic: \_\_\_\_\_ mmHg

**b) How satisfied are you with your health?**

(1) Very dissatisfied    (2) Dissatisfied    (3) Neither satisfied nor dissatisfied    (4) Satisfied    (5) Very satisfied

**c) How would you rate your health?**

(1) Very good    (2) Good    (3) Fair    (4) Poor    (5) Very poor

**d) Have you ever been diagnosed with any medical condition?**

(1) Yes    (2) No

**If yes, please indicate the condition(s) and the number of years since the diagnosis.**

| Condition                              | Years | Condition                 | Years |
|----------------------------------------|-------|---------------------------|-------|
| (1) Heart disease                      |       | (13) Alzheimer's disease  |       |
| (2) Hypertension (high blood pressure) |       | (14) Depression           |       |
| (3) Stroke (sequelae)                  |       | (15) Dyslipidemia         |       |
| (4) Osteoarthritis                     |       | (16) Diabetes             |       |
| (5) Rheumatoid arthritis               |       | (17) Vision problems      |       |
| (6) Low back pain                      |       | (18) Hearing loss         |       |
| (7) Osteoporosis                       |       | (19) Urinary incontinence |       |
| (8) Osteopenia                         |       | (20) Cancer or Tumors     |       |
| (9) Asthma                             |       | (21) Fibromyalgia         |       |
| (10) Chronic bronchitis                |       | (22) Gastritis            |       |
| (11) Emphysema                         |       | (23) Other:<br>_____      |       |
| (12) Chronic Constipation              |       |                           |       |

**e) Does your current health condition limit your ability to engage in physical activity or exercise?**

(0) Yes (1) No

**If yes, how does it limit you?**

(1) Fatigue (2) Shortness of breath (3) Dizziness (4) Pain – Where?

(5) Other – Please specify: \_\_\_\_\_

**f) Do you currently take any medications?**

(0) Yes (1) No

**If yes:**

How many? \_\_\_\_\_

Please list them: \_\_\_\_\_

**g) Have you experienced any falls in the past year?**

(0) Yes (1) No

**If yes:**

How many times? \_\_\_\_\_

Where did the fall(s) occur? \_\_\_\_\_

What were the consequences? \_\_\_\_\_

#### **4. Lifestyle Habits**

**a) Do you currently smoke?**

(0) Yes (1) No If yes, for how many years? \_\_\_\_\_

**b) Have you ever smoked in the past?**

(0) Yes (1) No If yes, for how many years? \_\_\_\_\_

**c) If you no longer smoke, how many years ago did you quit? \_\_\_\_\_**
